# Supplementary material for: Plant-Growth Endophytic Bacteria Improve Nutrient Use Efficiency and Modulate Foliar N-Metabolites in Sugarcane Seedling
Source: PubMed Central journal article supplement (PMC7996552; doi:10.3390/microorganisms9030479), 2021-02-25
Supplement: microorganisms-09-00479-s001.pdf [file microorganisms-09-00479-s001.pdf]

## Supplementary material

**Supplementary Table S1.** Soil chemical characterization.

|                                           |      |
|-------------------------------------------|------|
| pH                                        | 5.5  |
| CEC                                       | 120  |
| BS((mg/dm <sup>3</sup> )                  | 77   |
| P (mg/dm <sup>3</sup> )                   | 23   |
| H + Al (mmolc/dm <sup>3</sup> )           | 28   |
| Base saturation (mmolc.dm <sup>-3</sup> ) | 92   |
| Organic matter (gdm <sup>-3</sup> )       | 27   |
| K (mmolc.dm <sup>-3</sup> )               | 5    |
| Ca (mmolc.dm <sup>-3</sup> )              | 76   |
| Mg (mmolc.dm <sup>-3</sup> )              | 11   |
| B (mgdm <sup>-3</sup> )                   | 0.24 |
| Cu (mgdm <sup>-3</sup> )                  | 5.2  |
| Fe (mgdm <sup>-3</sup> )                  | 5.2  |
| Mn (mgdm <sup>-3</sup> )                  | 13.9 |
| Zn (mgdm <sup>-3</sup> )                  | 1.6  |

CEC: cation exchange capacity; BS: basic saturation; SB: sum of bases

**Supplementary Table S2.** *In vitro* activity of nitrate reductase (NR), nitrite reductase (NiR) and glutamine synthetase (GS) of sugarcane leaves.

| Treatments   | NR <sup>1</sup> | NiR <sup>1</sup> | GS <sup>2</sup> |
|--------------|-----------------|------------------|-----------------|
| Control      | 11.82 a*        | 8.04 a           | 11.85 a         |
| IAC/BECa-088 | 12.05 a         | 8.17 a           | 12.45 a         |
| IAC/BECa-090 | 11.56 a         | 8.01 a           | 13.01 a         |
| IAC/BECa-095 | 10.94 a         | 8.30 a           | 11.57 a         |
| IAC/BECa-135 | 11.27 a         | 8.56 a           | 13.37 a         |
| IAC/BECa-141 | 11.98 a         | 8.53 a           | 12.16 a         |
| IAC/BECa-152 | 11.66 a         | 7.94 a           | 11.52 a         |

<sup>1</sup>nmol NO<sub>2</sub><sup>-</sup> g<sup>-1</sup> FM h<sup>-1</sup>; <sup>2</sup>μmol GGH g<sup>-1</sup>MF h<sup>-1</sup>. \* means followed by similar letters are not significantly by Scott-Knott test ( $p < 0.05$ ).

**Supplementary Table S3.** Profile of amino acids and polyamines in sugarcane leaves in function of bacterial treatments, 45 days after transplanting.

| Treatments   | $\mu\text{mol g}^{-1}\text{DW}$ |    |        |   |         |   |       |   |         |   |            |   |           |   |           |   |           |   |           |   |         |   |        |   |               |   |
|--------------|---------------------------------|----|--------|---|---------|---|-------|---|---------|---|------------|---|-----------|---|-----------|---|-----------|---|-----------|---|---------|---|--------|---|---------------|---|
|              | Putrescine                      |    | Lysine |   | Glycine |   | Gaba  |   | Alanine |   | Citrulline |   | Glutamate |   | Threonine |   | Aspartate |   | Glutamine |   | Proline |   | Valine |   | Phenylalanine |   |
| Control      | 880.3                           | a* | 16.83  | a | 277.5   | b | 6.58  | a | 755.9   | b | 16.97      | a | 7.87      | a | 36.17     | a | 166.4     | a | 7.23      | a | 104.22  | a | 14.57  | a | 326.5         | a |
| IAC/BECa-088 | 523.2                           | b  | 16.21  | a | 376.5   | b | 6.40  | a | 2150.9  | a | 16.38      | a | 8.49      | a | 37.46     | a | 195.7     | a | 2.79      | b | 99.64   | a | 14.52  | a | 344.1         | a |
| IAC/BECa-090 | 565.2                           | b  | 20.15  | a | 616.1   | a | 5.11  | a | 1089.7  | b | 13.52      | b | 6.15      | a | 33.88     | a | 161.4     | a | 5.87      | a | 70.63   | b | 16.34  | a | 376.0         | a |
| IAC/BECa-095 | 635.0                           | b  | 16.04  | a | 485.2   | a | 6.24  | a | 2064.3  | a | 12.45      | b | 8.34      | a | 37.80     | a | 165.0     | a | 4.29      | b | 93.32   | a | 18.02  | a | 382.2         | a |
| IAC/BECa-135 | 450.9                           | b  | 17.99  | a | 475.2   | a | 5.86  | a | 608.6   | b | 11.75      | b | 7.88      | a | 32.92     | a | 108.0     | b | 4.86      | a | 75.96   | b | 15.55  | a | 303.7         | a |
| IAC/BECa-141 | 564.5                           | b  | 13.8   | a | 397.5   | b | 4.63  | a | 1029.9  | b | 11.52      | b | 3.23      | b | 26.08     | a | 98.9      | b | 2.36      | b | 67.44   | b | 15.63  | a | 285.0         | a |
| IAC/BECa-152 | 580.2                           | b  | 24.98  | a | 591.4   | a | 3.70  | a | 500.5   | b | 11.94      | b | 4.30      | b | 36.46     | a | 95.4      | b | 6.38      | a | 82.27   | b | 16.74  | a | 414.5         | a |
| CV%          | 34.33                           |    | 35.3   |   | 26.42   |   | 38.05 |   | 63.97   |   | 27.14      |   | 44.93     |   | 28.23     |   | 21.79     |   | 54.04     |   | 24.97   |   | 21.85  |   | 24.97         |   |

\* means followed by similar letters are not significantly by Scott-Knott test ( $P < 0.05$ ). CV(%): coefficient of variation.
